# Supplementary material for: Electrochemically Reduced Water Delays Mammary Tumors Growth in Mice and Inhibits Breast Cancer Cells Survival In Vitro
Source: Hindawi journal article supplement (doi:10.1155/2018/4753507), 2018-01-01
Supplement: f1 [file 4753507.f1.pdf]

## Supplementary data

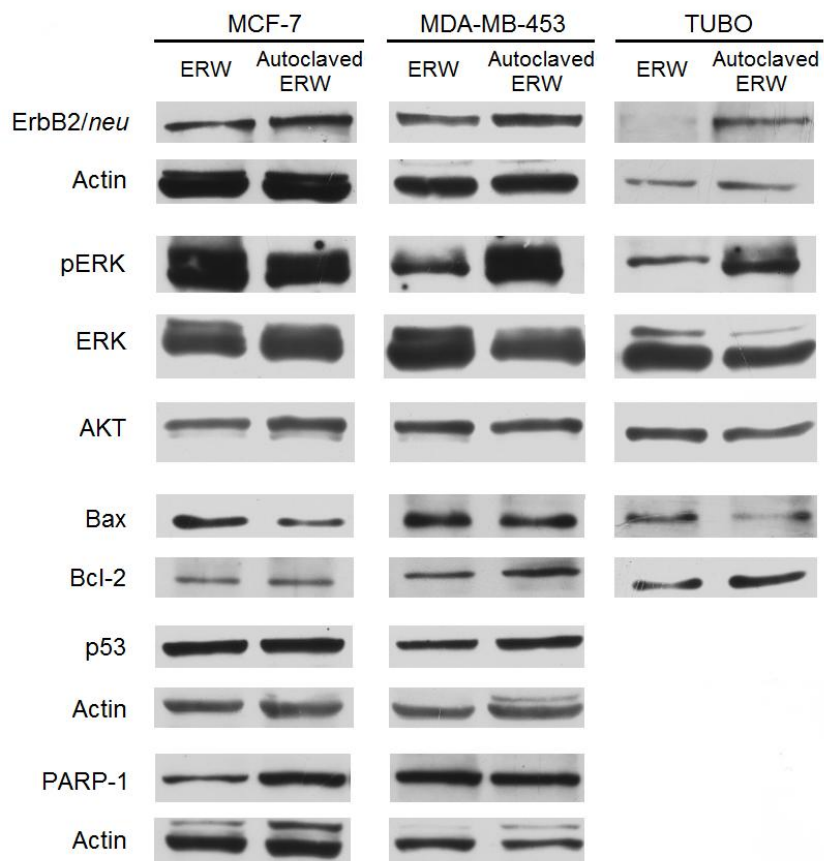

**Fig. S1.** Effect of ERW on the expression and activation of ErbB receptor and pro-survival signaling pathway molecules and on apoptosis. Western blotting analysis was performed on breast cancer cell lines that were treated with ERW and autoclaved ERW for 48 hours.
